# Supplementary material for: Superhydrophobic catalyst-wrapped fibrofelt with anti-moisture, anti-dusting and NH3-SCR properties
Source: Royal Society of Chemistry journal article supplement (doi:10.1039/d2nj01740g), 2022-01-01
Supplement: d2nj01740g9.pdf [file d2nj01740g9.pdf]

## Supporting information

### Superhydrophobic catalyst-wrapped fibrofelt with anti-moisture, anti-dusting and NH<sub>3</sub>-SCR properties

Ping Liu<sup>a</sup>, Yongling Yang<sup>a</sup>, Wei Wang<sup>a</sup>, Wancheng Gu<sup>a</sup>, Junxu Chen<sup>a</sup>, Chujun Chen<sup>a</sup>, Xinquan Yu<sup>a\*</sup>, Youfa Zhang<sup>a\*</sup>  
<sup>a</sup> Jiangsu Key Laboratory of Advanced Metallic Materials, School of Materials Science and Engineering, Southeast University, Southeast Road 2nd, Nanjing, 211189, Nanjing, P.R. China

\*Corresponding author: Xinquan Yu (101004070@seu.edu.cn); Youfa Zhang (yfzhang@seu.edu.cn)

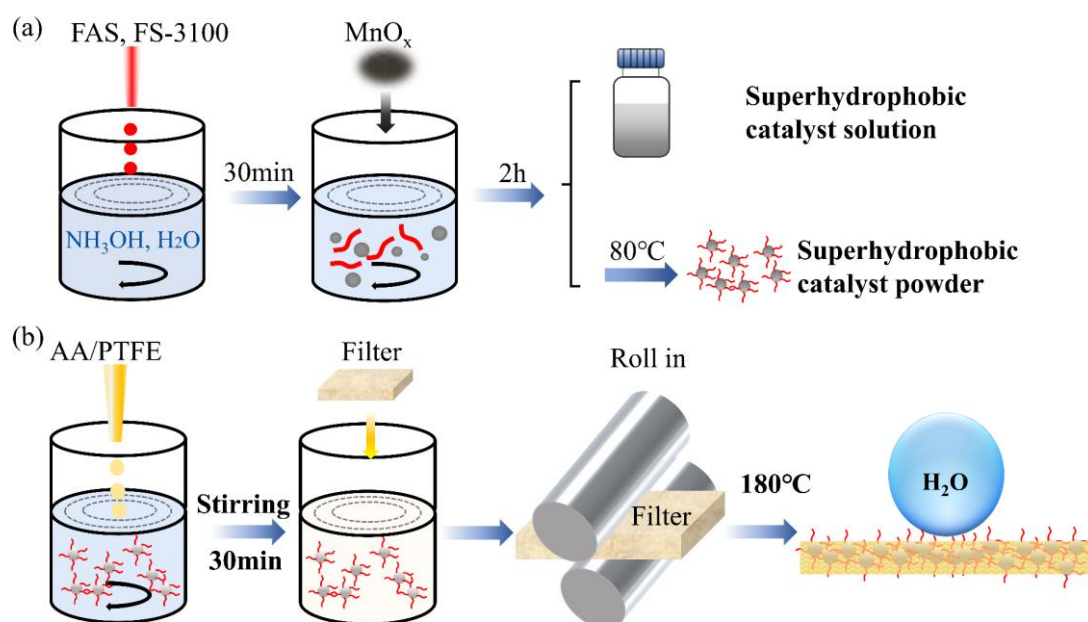

Figure. S1 Schematic diagram of preparation process. (a) Schematic diagram of superhydrophobic catalyst preparation process. (b) Schematic illustrations on the process of the synthesis for superhydrophobic filter materials with integrated denitration and dust removal function.

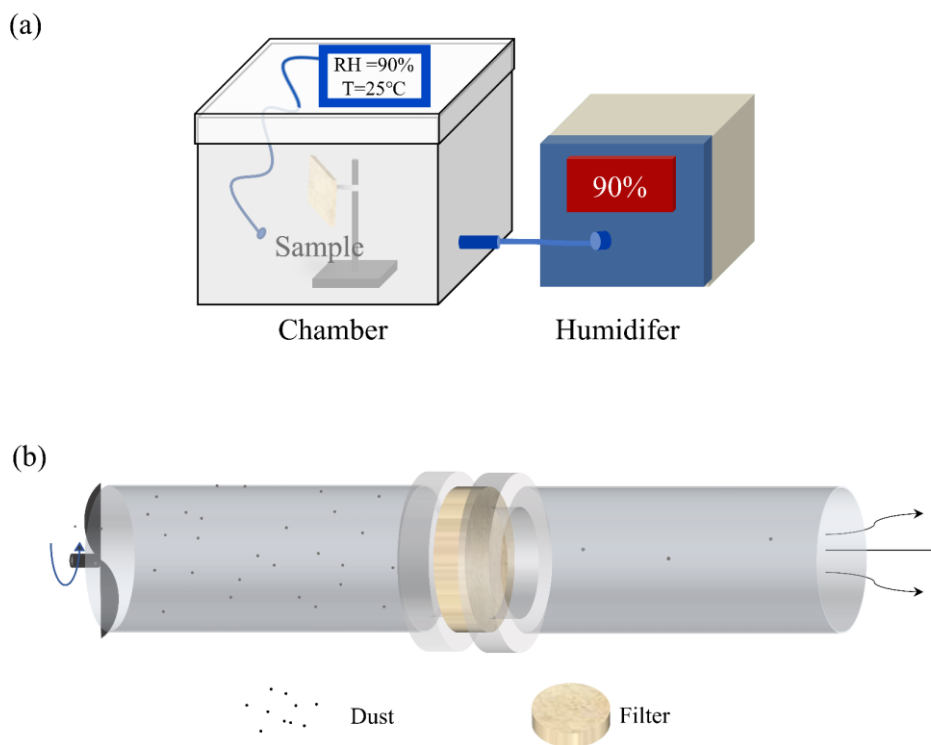

Figure.S2 Schematic diagram of (a) moisture-proof and (b) dust-proof device.

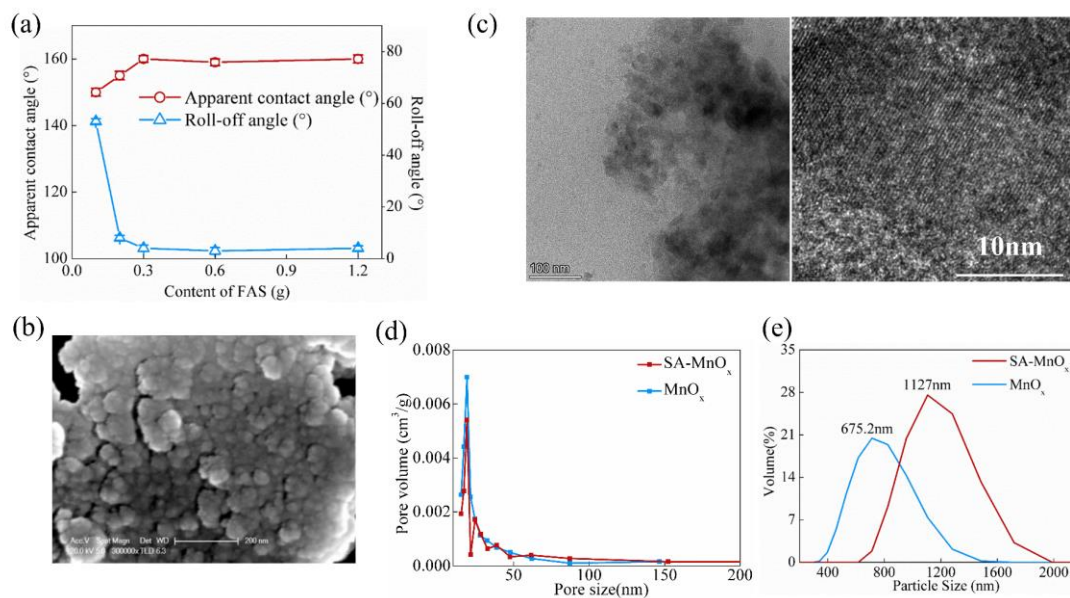

Figure.S3 (a) The static contact angle and rolling angle on the surface of  $\text{MnO}_x$  catalyst changed with the content of FAS. (b) SEM and (c) TEM image of  $\text{MnO}_x$  catalyst powder. (d) pore size distribution and (e) particle size of  $\text{MnO}_x$  catalyst before and after modification.

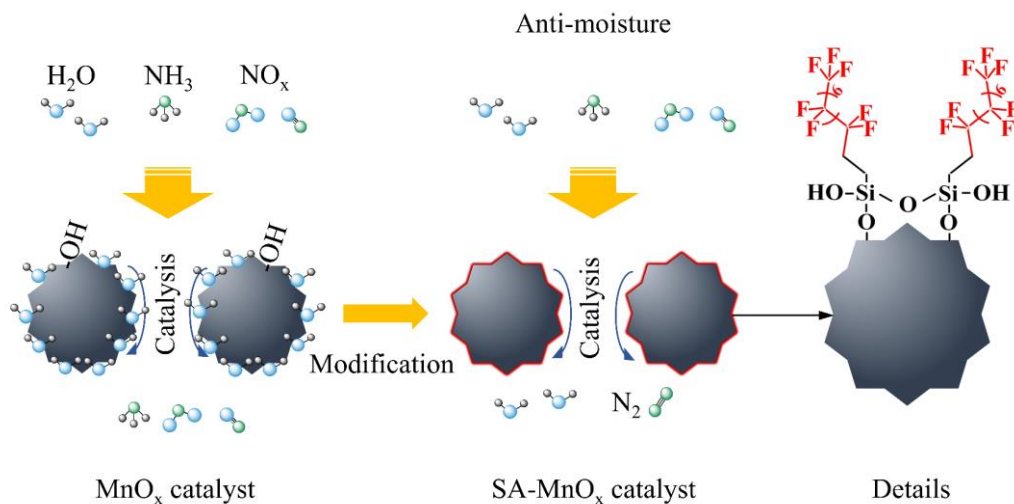

Figure.S4 Moisture proof mechanism of the modified catalyst.

Table. S1 Specific surface area and pore structure parameters of MnO<sub>x</sub> and SA-MnO<sub>x</sub> catalyst before and after modification

| Catalyst            | Specific surface area (m <sup>2</sup> /g) | Pore volume(cm <sup>3</sup> /g) | Pore size(nm) |
|---------------------|-------------------------------------------|---------------------------------|---------------|
| MnO <sub>x</sub>    | 61.851                                    | 0.165                           | 19.111        |
| SA-MnO <sub>x</sub> | 60.196                                    | 0.155                           | 19.109        |

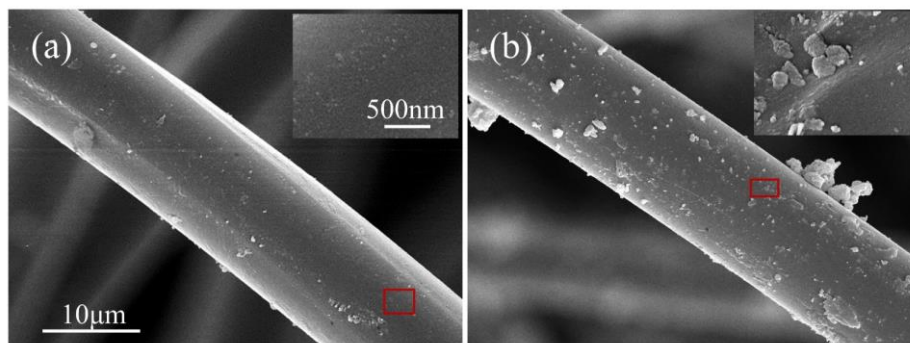

Figure.S5 SEM of filter (a) Original, (b) MnO<sub>x</sub>@Filter (no resin).

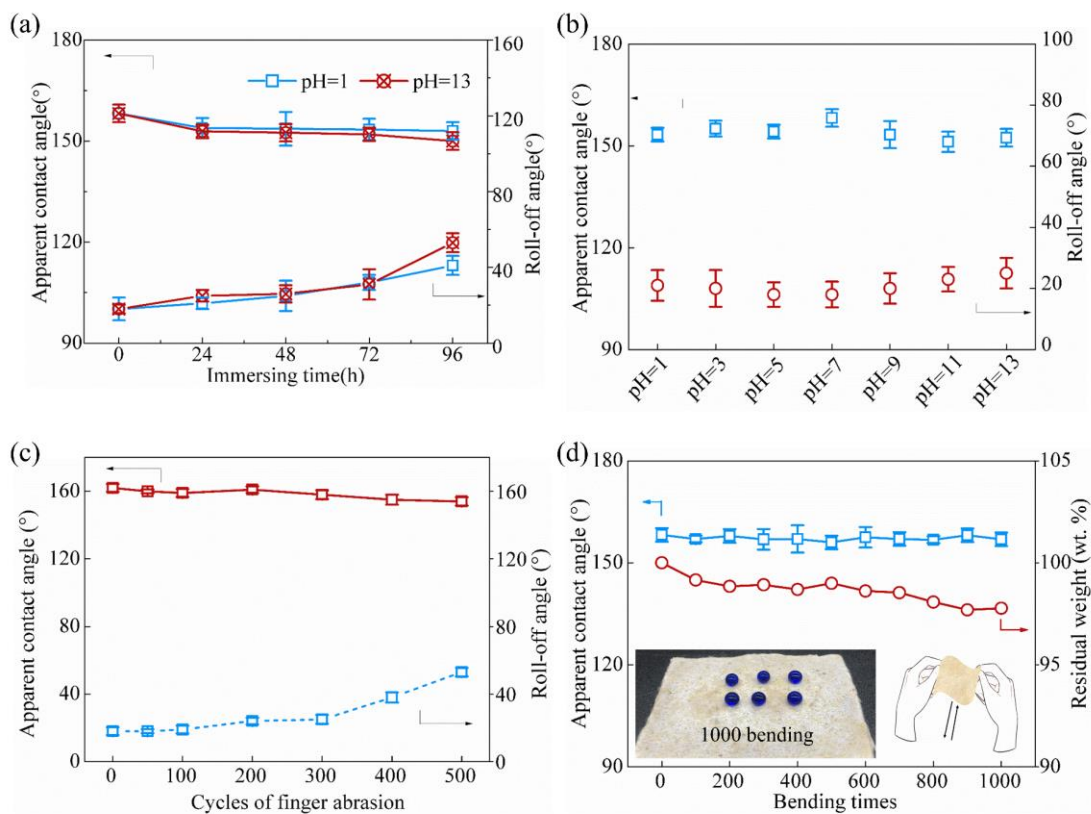

Figure. S6 (a) Wettability of SA-MnO<sub>x</sub>@Filter after being immersed in solutions with pH = 1 or 13 for 96 hours. (b) Change in the contact angles and rolling angles for water in different corrosive solutions (pH=1 - 13) after immersing for 24h. (c) Wettability of SA-MnO<sub>x</sub>@Filter after being wiped by finger for 500 cycles. (d) Residual weight of SA-MnO<sub>x</sub>@Filter after 1000 times of bending.

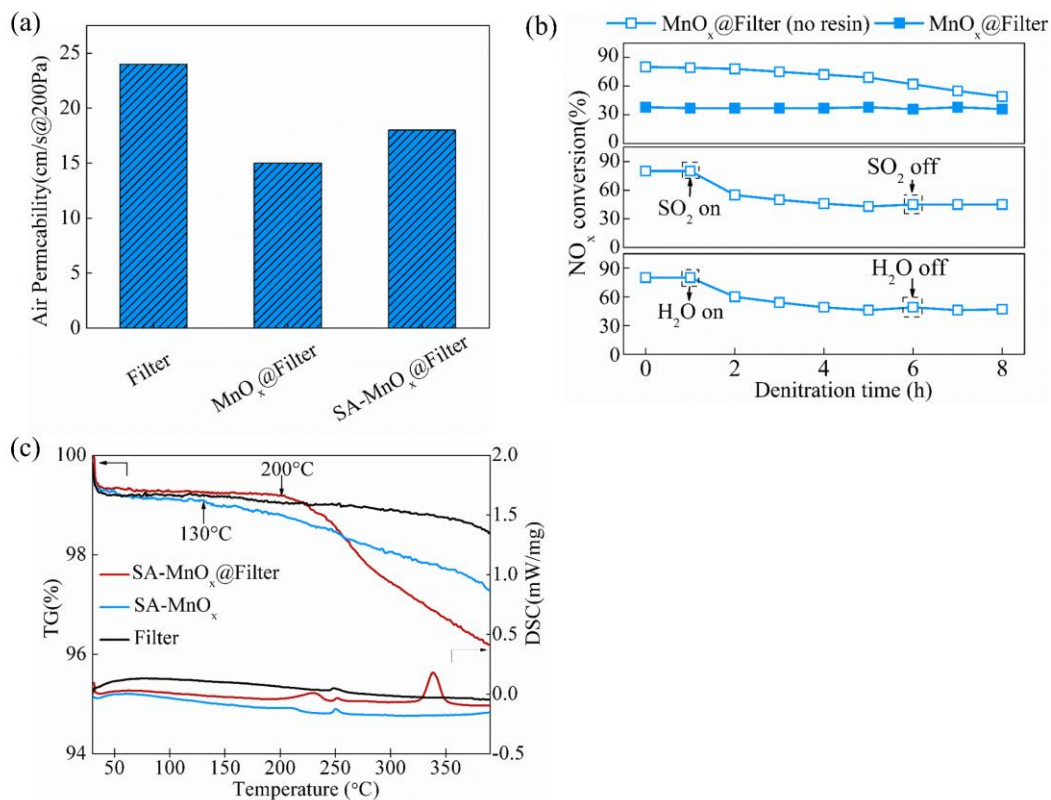

Figure.S7 (a) The air permeability of filter. (b) NO<sub>x</sub> conversions of MnO<sub>x</sub>@Filter (no resin) at 180°C in the presence of SO<sub>2</sub> or H<sub>2</sub>O (Reaction conditions: [NO<sub>x</sub>] = [NH<sub>3</sub>] = 500 ppm, [O<sub>2</sub>] = 6 vol. %, 100 ppm SO<sub>2</sub> (when used), 10 vol. % H<sub>2</sub>O (when used), total gas flow 700 ml•min<sup>-1</sup> (corresponding to the filtration velocity of 1 m•min<sup>-1</sup>), N<sub>2</sub> balance.). (c) TG and DSC curves of blank filter, SA-MnO<sub>x</sub> catalyst and SA-MnO<sub>x</sub>@Filter.
