# Supplementary figures and images for: Superhydrophobic catalyst-wrapped fibrofelt with anti-moisture, anti-dusting and NH3-SCR properties
Source: Royal Society of Chemistry journal article supplement (doi:10.1039/d2nj01740g), 2022-01-01

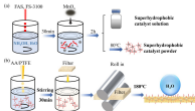

Supplement: d2nj01740g2.pdf [file d2nj01740g2.pdf]

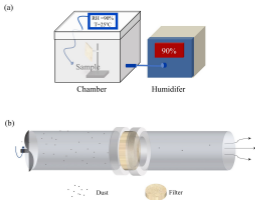

Supplement: d2nj01740g3.pdf [file d2nj01740g3.pdf]

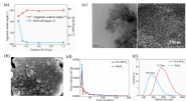

Supplement: d2nj01740g4.pdf [file d2nj01740g4.pdf]

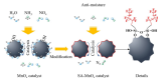

Supplement: d2nj01740g5.pdf [file d2nj01740g5.pdf]

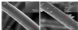

Supplement: d2nj01740g6.pdf [file d2nj01740g6.pdf]

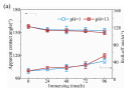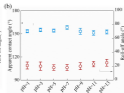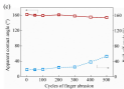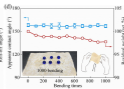

Supplement: d2nj01740g7.pdf [file d2nj01740g7.pdf]

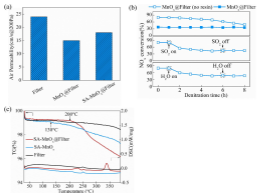

Supplement: d2nj01740g8.pdf [file d2nj01740g8.pdf]
